# Supplementary material for: Hair Follicle Dermal Cells Support Expansion of Murine and Human Embryonic and Induced Pluripotent Stem Cells and Promote Haematopoiesis in Mouse Cultures
Source: PubMed Central journal article supplement (PMC6098861; doi:10.1155/2018/8631432), 2018-08-02
Supplement: 8631432.f1.pdf [file 8631432.f1.pdf]

SUPPLEMENTARY MATERIAL – LIU et al.

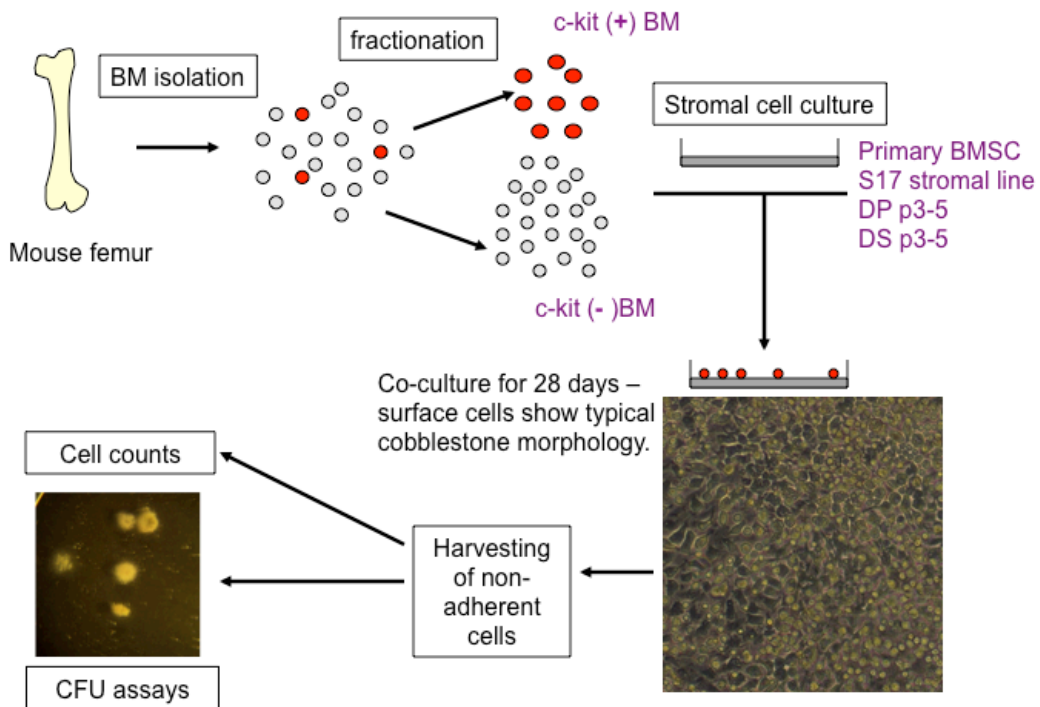

S1 – Schematic showing the strategy used to compare the support of hair follicle dermal cells and bone marrow stromal cells for blood cells.

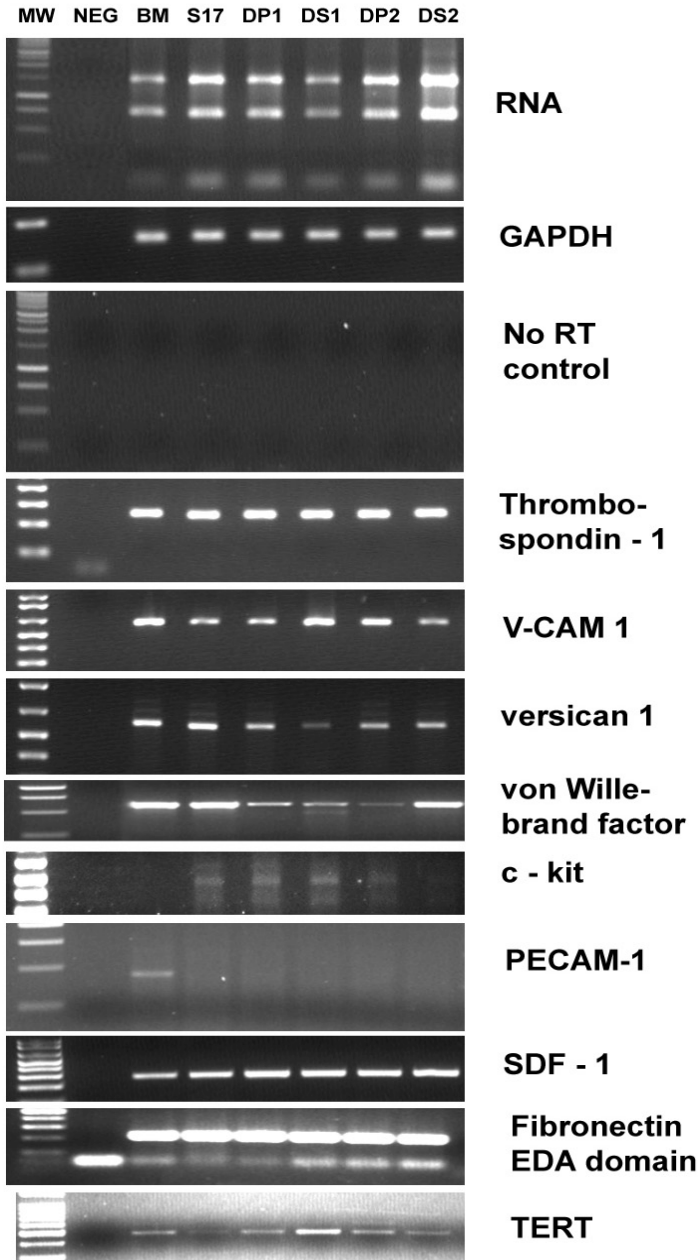

S2 RT-PCR demonstrates that important markers of the haematopoietic environment including, Thrombospondin-1, V-CAM 1 and SDF-1 are expressed in bone marrow stromal cells (BM), S-17 an immortalized stromal cell culture line, as well as hair follicle dermal papilla (DP) and dermal sheath (DS) cells (two strains shown).
